# Supplementary material for: Relative Contributions of Prenylation and Postprenylation Processing in Cryptococcus neoformans Pathogenesis
Source: PubMed Central journal article supplement (PMC4894686; doi:10.1128/msphere.00084-15), 2016-03-30
Supplement: sph002162047sf1.pdf [file sph002162047sf1.pdf]

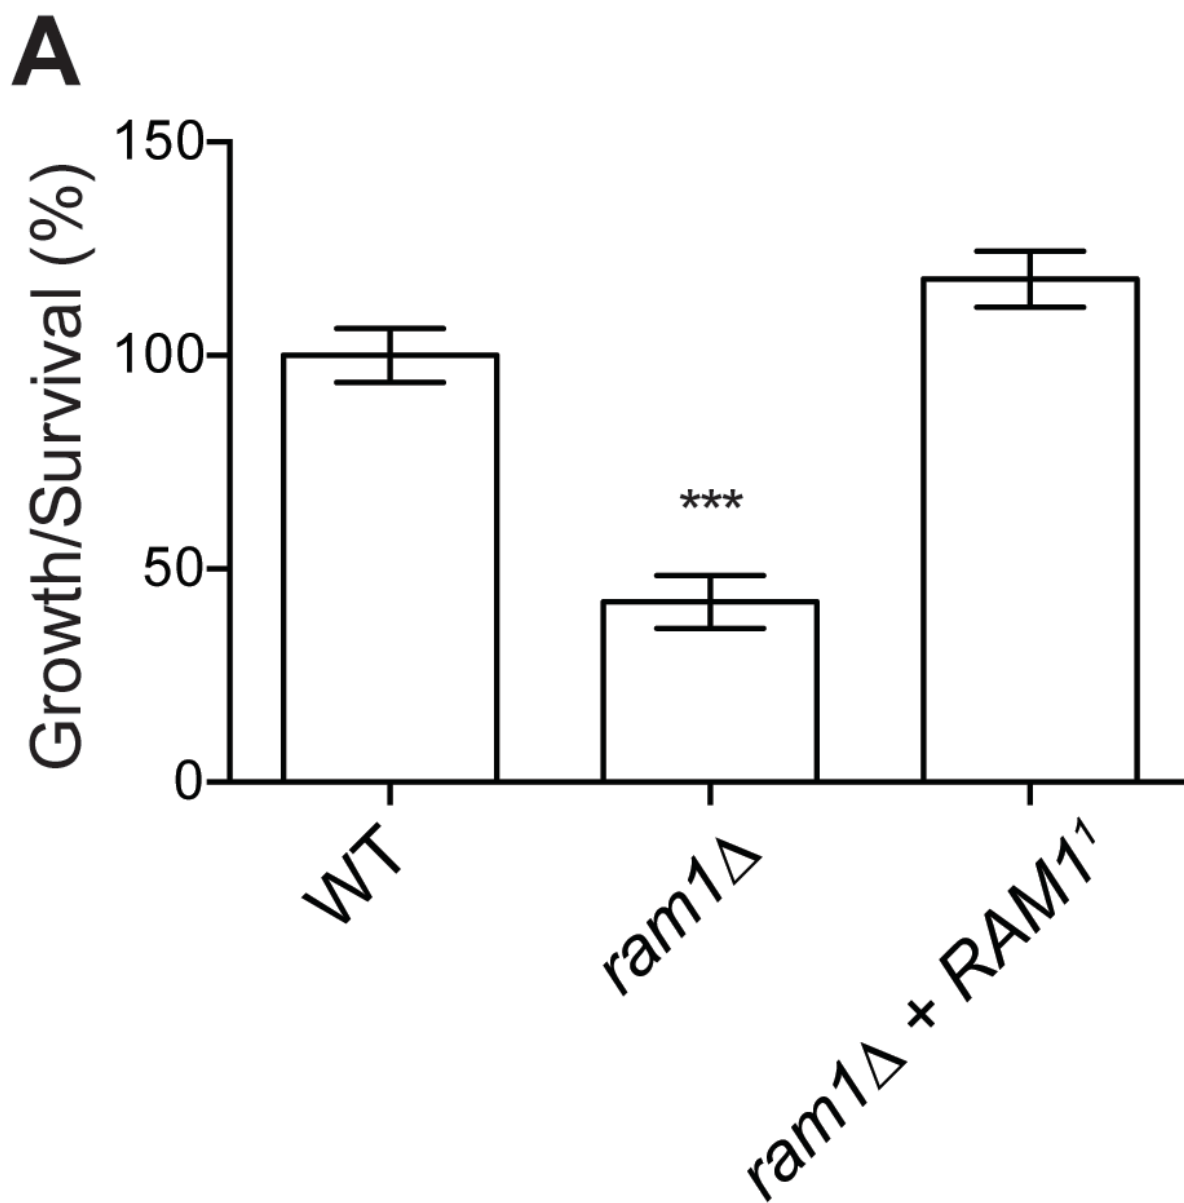

Figure S1. An independent ram1Δ + RAM1 reconstituted strain fully restores ram1Δ mutant in vitro virulence defects. Wild type (H99), ram1Δ (SKE1), and a second ram1Δ reconstituted strain (ram1Δ + RAM11, SKE39) were each co-incubated with activated J774.1 cells for 1 h, followed by removal of non-phagocytosed yeast. Cell survival was assessed at 24 h by quantitative culture. Data are represented as mean ± standard error of 4 replicates. \*\*, P < 0.001 (vs. WT and vs. ram1Δ + RAM11), as determined by one-way ANOVA and Tukey-Kramer.
