# Supplementary material for: Relative Contributions of Prenylation and Postprenylation Processing in Cryptococcus neoformans Pathogenesis
Source: PubMed Central journal article supplement (PMC4894686; doi:10.1128/msphere.00084-15), 2016-03-30
Supplement: sph002162047sf2.pdf [file sph002162047sf2.pdf]

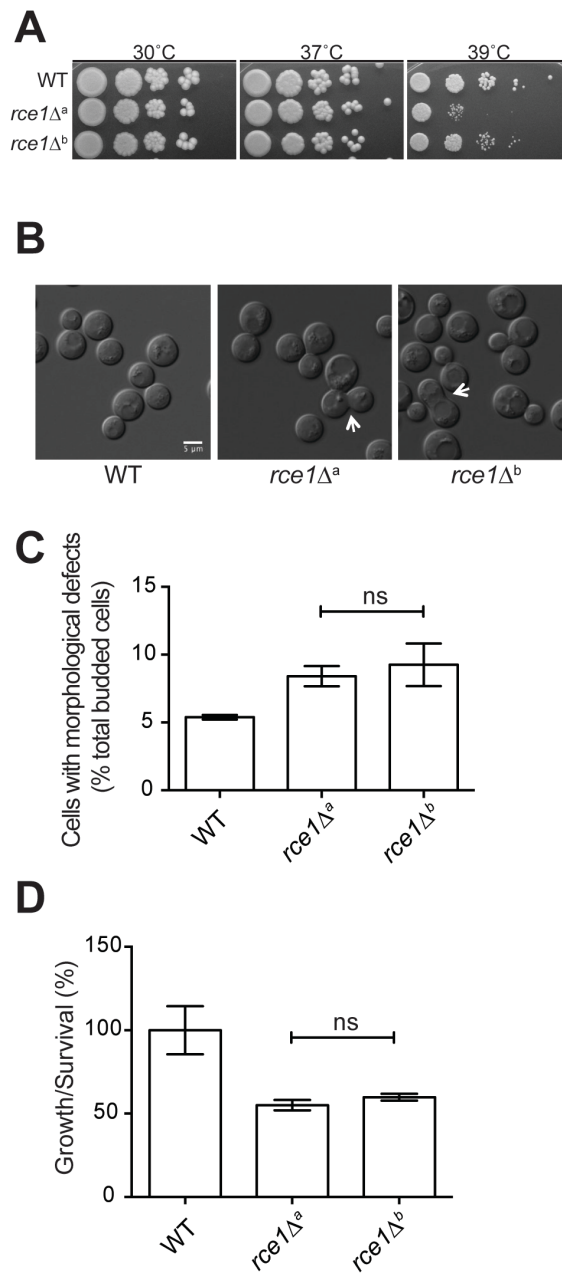

Figure S2. Two independent *rce1Δ* mutants display similar phenotypes. (A) Overnight cultures of wild type (H99), *rce1Δ<sup>a</sup>* (LKA1), and *rce1Δ<sup>b</sup>* (SKE51) were serially diluted, spotted onto YPD medium, and incubated at 30°C, 37°C, and 39°C for 48 h. (B) Wild type (H99), *rce1Δ<sup>a</sup>* (LKA1), and *rce1Δ<sup>b</sup>* (SKE51) were incubated in YPD liquid medium and shifted to 37°C for 24 h. Cells were imaged with DIC optics to assess temperature-dependent alterations in morphology. Bar, 5 μm. (C) Quantification of morphological defects after 24 h incubation at 37°C. Data represent mean ± standard error percent of budded cells with morphological changes, which included wide bud necks, elongated/unseparated cells, and/or chains of cells. ImageJ (Fiji) software was used to count at least 600 cells over 3 biological replicates for each strain (WT and *rce1Δ<sup>a</sup>* data also appear in Figure 3) (add citation). ns, not significant as determined by one-way ANOVA and Tukey multiple comparisons test. (D) Wild type (H99), *rce1Δ<sup>a</sup>* (LKA1), and *rce1Δ<sup>b</sup>* (SKE51) were co-incubated with J774.1 cells as described above. \*,  $P < 0.05$  vs. WT, as determined by one-way ANOVA and Tukey-Kramer.
